# Supplementary material
Source: Springer Nature journal article supplement (https://www.springermedizin.de/resource/supplementary/12899_2012_200_MOESM11_ESM.pdf/9514664)

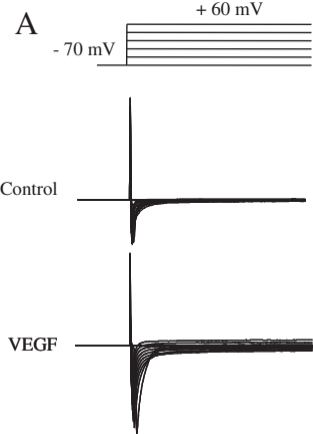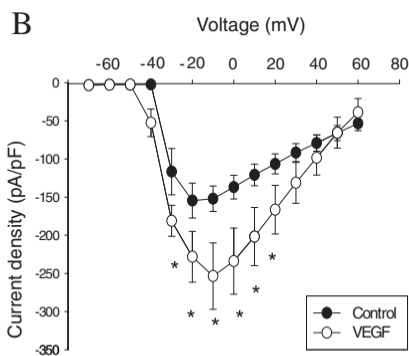

Supplement: MOESM11 [file 9514664]
